# Supplementary material for: Long-Term Zinc Supplementation Improves Liver Function and Decreases the Risk of Developing Hepatocellular Carcinoma
Source: MDPI journal article supplement (doi:10.3390/nu10121955), 2018-12-10
Supplement: s1 [file s1]

# Supplementary Table 1

|                                                   |                             | Zn group          | No treatment group | p-value  |
|---------------------------------------------------|-----------------------------|-------------------|--------------------|----------|
| the number of patients                            |                             | 196               | 71                 |          |
| alcohol consumption<br>(no/small/large)           |                             | 164 / 6 / 26      | 60 / 3 / 8         | ns       |
| DM (with/without)                                 |                             | 53 / 143          | 12 / 59            | p=0.054  |
| BMI (kg/m <sup>2</sup> )                          |                             | 22.4±4.1          | 22.2±3.6           | ns       |
| Attending physician<br>(Dr. A/Dr. B/Dr. C/others) |                             | 72 / 66 / 11 / 47 | 32 / 28 / 5 / 6    | ns       |
| concomitant<br>drugs                              | BCAA<br>(with/without)      | 150 / 46          | 51 / 20            | ns       |
|                                                   | Diuretics<br>(with/without) | 82 / 114          | 3 / 68             | p<0.0001 |
|                                                   | UDCA<br>(with/without)      | 123 / 73          | 44 / 27            | ns       |

Alcohol consumption, small: 0< <60g/day, large: 60g ≤/day

BCAA: branched-chain amino acid

UDCA: ursodeoxycholic acid
