# Supplementary figures and images for: Long-Term Zinc Supplementation Improves Liver Function and Decreases the Risk of Developing Hepatocellular Carcinoma
Source: MDPI journal article supplement (doi:10.3390/nu10121955), 2018-12-10

# Supplementary Figure 1

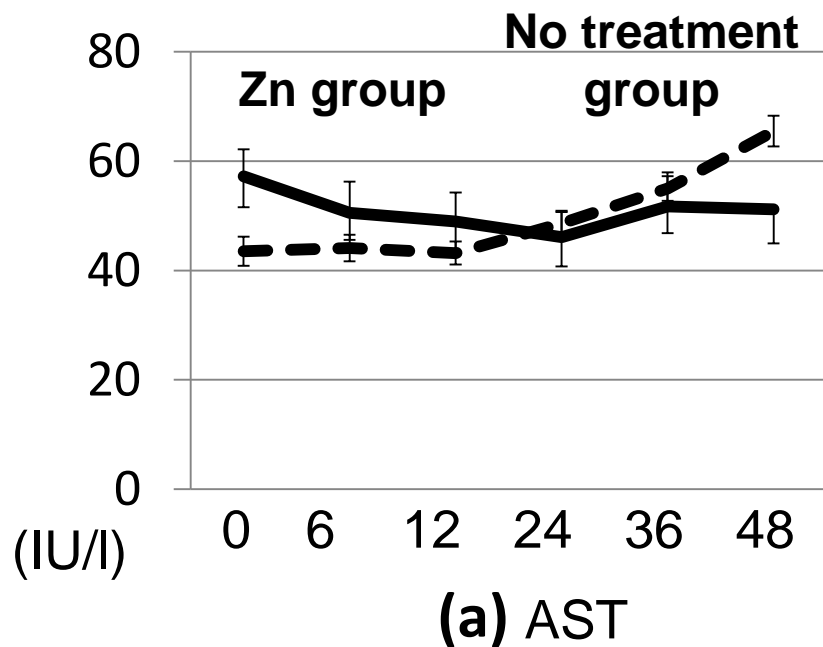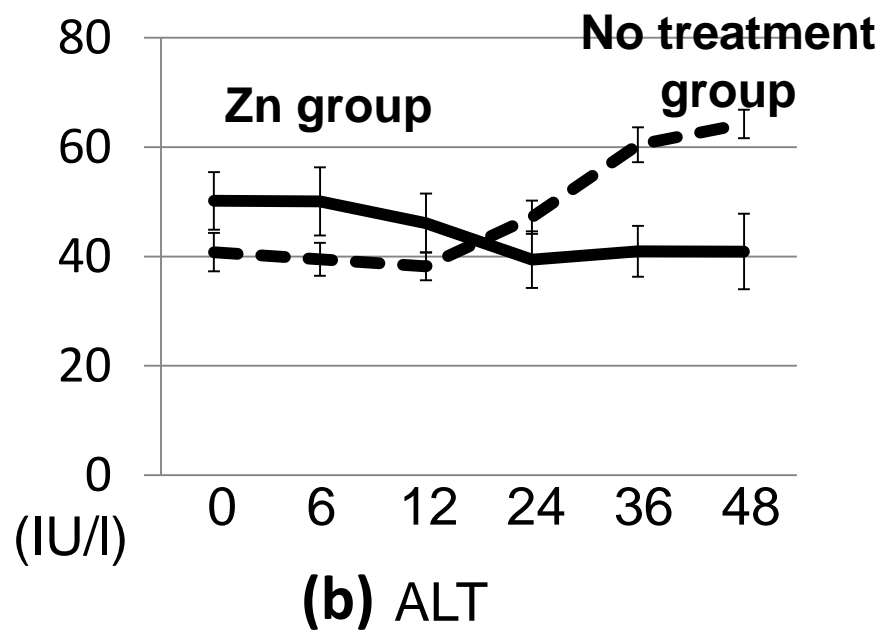

Supplement: s1 [file s1]
